# Supplementary material for: Are people with metabolically healthy obesity really healthy? A prospective cohort study of 381,363 UK Biobank participants
Source: Springer Nature journal article supplement (doi:10.1007/s00125-021-05484-6), 2021-06-09

## Electronic Supplementary Materials

### Are people with metabolically healthy obesity really healthy? A prospective cohort study of 381,363 UK Biobank participants

Ziyi Zhou<sup>1</sup>, John Macpherson<sup>1</sup>, Stuart R Gray<sup>2</sup>, Jason M R Gill<sup>2</sup>, Paul Welsh<sup>2</sup>, Carlos Celis-Morales<sup>1,2,3</sup>, Naveed Sattar<sup>2</sup>, Jill P Pell<sup>1</sup>, Frederick K Ho<sup>1</sup>

<sup>1</sup>Institute of Health and Wellbeing, University of Glasgow, Glasgow, UK

<sup>2</sup>Institute of Cardiovascular and Medical Sciences, University of Glasgow, Glasgow, UK

<sup>3</sup>Human Performance Lab, Education, Physical Activity and Health Research Unit, University Católica del Maule, Talca, Chile

Carlos Celis-Morales, Naveed Sattar, Jill P. Pell and Frederick K. Ho are joint senior authors.

#### Corresponding author:

Frederick Ho,

Email: [Frederick.Ho@glasgow.ac.uk](mailto:Frederick.Ho@glasgow.ac.uk)

**ESM Table 1.** Criteria for metabolically healthy

| <b>Biomarker</b>                             | <b>Criteria for Metabolically Healthy</b>                          |
|----------------------------------------------|--------------------------------------------------------------------|
| BP                                           | SBP <130 mmHg and DBP <80 mmHg and no antihypertensive medications |
| C-reactive protein (CRP)                     | CRP <3 mg/L                                                        |
| Triacylglycerols                             | Triacylglycerols <2.3 mmol/L                                       |
| Low-density lipoprotein cholesterol (LDL-c)  | LDL-c <3 mmol/L and no cholesterol lowering medications            |
| High-density lipoprotein cholesterol (HDL-c) | HDL-c >1 mmol/L                                                    |
| Glycated haemoglobin                         | HbA <sub>1c</sub> <42 mmol/mol (6%) and no diabetes medications    |

**ESM Table 2.** Association between MHO and incidence outcomes

|                            | <b>Model 1</b>       |          | <b>Model 2</b>       |          |
|----------------------------|----------------------|----------|----------------------|----------|
|                            | <b>HR (95% CI)</b>   | <b>P</b> | <b>HR (95% CI)</b>   | <b>P</b> |
| <b>Diabetes</b>            |                      |          |                      |          |
| MHN                        | 1 (Reference)        |          | 1 (Reference)        |          |
| MHO                        | 4.79 (4.27, 5.37)    | <0.0001  | 4.55 (4.05, 5.10)    | <0.0001  |
| MUN                        | 5.67 (5.16, 6.22)    | <0.0001  | 5.43 (4.94, 5.96)    | <0.0001  |
| MUO                        | 14.79 (13.56, 16.13) | <0.0001  | 13.72 (12.57, 14.98) | <0.0001  |
| <b>ASCVD</b>               |                      |          |                      |          |
| MHN                        | 1 (Reference)        |          | 1 (Reference)        |          |
| MHO                        | 1.22 (1.14, 1.30)    | <0.0001  | 1.15 (1.08, 1.23)    | <0.0001  |
| MUN                        | 1.68 (1.61, 1.75)    | <0.0001  | 1.62 (1.55, 1.69)    | <0.0001  |
| MUO                        | 1.90 (1.82, 1.99)    | <0.0001  | 1.77 (1.69, 1.85)    | <0.0001  |
| <b>MI</b>                  |                      |          |                      |          |
| MHN                        | 1 (Reference)        |          | 1 (Reference)        |          |
| MHO                        | 1.26 (1.14, 1.39)    | <0.0001  | 1.20 (1.09, 1.32)    | 0.0003   |
| MUN                        | 1.93 (1.82, 2.05)    | <0.0001  | 1.87 (1.76, 1.98)    | <0.0001  |
| MUO                        | 2.14 (2.00, 2.28)    | <0.0001  | 1.99 (1.87, 2.13)    | <0.0001  |
| <b>Stroke</b>              |                      |          |                      |          |
| MHN                        | 1 (Reference)        |          | 1 (Reference)        |          |
| MHO                        | 1.12 (1.03, 1.22)    | 0.01     | 1.07 (0.98, 1.17)    | 0.12     |
| MUN                        | 1.32 (1.25, 1.39)    | <0.0001  | 1.28 (1.21, 1.36)    | <0.0001  |
| MUO                        | 1.48 (1.39, 1.57)    | <0.0001  | 1.40 (1.31, 1.49)    | <0.0001  |
| <b>HF</b>                  |                      |          |                      |          |
| MHN                        | 1 (Reference)        |          | 1 (Reference)        |          |
| MHO                        | 1.93 (1.78, 2.10)    | <0.0001  | 1.81 (1.67, 1.96)    | <0.0001  |
| MUN                        | 1.55 (1.46, 1.65)    | <0.0001  | 1.49 (1.40, 1.58)    | <0.0001  |
| MUO                        | 2.93 (2.76, 3.11)    | <0.0001  | 2.68 (2.52, 2.84)    | <0.0001  |
| <b>Respiratory disease</b> |                      |          |                      |          |
| MHN                        | 1 (Reference)        |          | 1 (Reference)        |          |
| MHO                        | 1.37 (1.33, 1.41)    | <0.0001  | 1.30 (1.26, 1.35)    | <0.0001  |
| MUN                        | 1.32 (1.29, 1.35)    | <0.0001  | 1.27 (1.24, 1.30)    | <0.0001  |
| MUO                        | 1.65 (1.61, 1.68)    | <0.0001  | 1.53 (1.49, 1.57)    | <0.0001  |
| <b>COPD</b>                |                      |          |                      |          |
| MHN                        | 1 (Reference)        |          | 1 (Reference)        |          |
| MHO                        | 1.41 (1.31, 1.51)    | <0.0001  | 1.18 (1.10, 1.27)    | <0.0001  |
| MUN                        | 1.82 (1.74, 1.90)    | <0.0001  | 1.62 (1.55, 1.70)    | <0.0001  |
| MUO                        | 2.24 (2.13, 2.35)    | <0.0001  | 1.74 (1.66, 1.83)    | <0.0001  |

Model 1: Adjusted for age, sex, and ethnicity only.

Model 2: Additionally adjusted for education level and deprivation index.

MHN: metabolically healthy non-obese; MHO; metabolically healthy obese; MUN; metabolically unhealthy non-obese; MUO metabolically unhealthy obese

**ESM Table 3.** Association between MHO and mortality outcomes

|                            | Model 1           |          | Model 2           |          |
|----------------------------|-------------------|----------|-------------------|----------|
|                            | HR (95% CI)       | P        | HR (95% CI)       | P        |
| <b>All-cause mortality</b> |                   |          |                   |          |
| MHN                        | 1 (Reference)     |          | 1 (Reference)     |          |
| MHO                        | 1.27 (1.19, 1.36) | < 0.0001 | 1.21 (1.13, 1.29) | < 0.0001 |
| MUN                        | 1.38 (1.33, 1.44) | < 0.0001 | 1.34 (1.28, 1.40) | < 0.0001 |
| MUO                        | 1.69 (1.62, 1.77) | < 0.0001 | 1.57 (1.49, 1.64) | < 0.0001 |
| <b>ASCVD</b>               |                   |          |                   |          |
| MHN                        | 1 (Reference)     |          | 1 (Reference)     |          |
| MHO                        | 1.47 (1.28, 1.68) | < 0.0001 | 1.36 (1.18, 1.56) | < 0.0001 |
| MUN                        | 1.96 (1.80, 2.14) | < 0.0001 | 1.87 (1.72, 2.04) | < 0.0001 |
| MUO                        | 2.50 (2.29, 2.74) | < 0.0001 | 2.23 (2.04, 2.45) | < 0.0001 |
| <b>MI</b>                  |                   |          |                   |          |
| MHN                        | 1 (Reference)     |          | 1 (Reference)     |          |
| MHO                        | 1.76 (1.34, 2.33) | < 0.0001 | 1.63 (1.23, 2.15) | 0.0006   |
| MUN                        | 2.53 (2.12, 3.02) | < 0.0001 | 2.41 (2.02, 2.88) | < 0.0001 |
| MUO                        | 3.08 (2.55, 3.71) | < 0.0001 | 2.74 (2.27, 3.32) | < 0.0001 |
| <b>Stroke</b>              |                   |          |                   |          |
| MHN                        | 1 (Reference)     |          | 1 (Reference)     |          |
| MHO                        | 1.13 (0.90, 1.43) | 0.30     | 1.06 (0.84, 1.34) | 0.63     |
| MUN                        | 1.32 (1.14, 1.53) | 0.0003   | 1.27 (1.09, 1.47) | 0.002    |
| MUO                        | 1.59 (1.36, 1.87) | < 0.0001 | 1.45 (1.23, 1.71) | < 0.0001 |
| <b>HF</b>                  |                   |          |                   |          |
| MHN                        | 1 (Reference)     |          | 1 (Reference)     |          |
| MHO                        | 2.11 (1.65, 2.70) | < 0.0001 | 1.92 (1.50, 2.46) | < 0.0001 |
| MUN                        | 2.01 (1.68, 2.40) | < 0.0001 | 1.90 (1.59, 2.27) | < 0.0001 |
| MUO                        | 3.40 (2.85, 4.05) | < 0.0001 | 2.97 (2.49, 3.55) | < 0.0001 |
| <b>Respiratory disease</b> |                   |          |                   |          |
| MHN                        | 1 (Reference)     |          | 1 (Reference)     |          |
| MHO                        | 1.40 (1.23, 1.60) | < 0.0001 | 1.24 (1.09, 1.42) | 0.002    |
| MUN                        | 1.72 (1.57, 1.87) | < 0.0001 | 1.60 (1.46, 1.74) | < 0.0001 |
| MUO                        | 2.38 (2.18, 2.60) | < 0.0001 | 2.00 (1.83, 2.19) | < 0.0001 |
| <b>COPD</b>                |                   |          |                   |          |
| MHN                        | 1 (Reference)     |          | 1 (Reference)     |          |
| MHO                        | 1.09 (0.83, 1.44) | 0.53     | 0.86 (0.65, 1.13) | 0.27     |
| MUN                        | 1.96 (1.68, 2.29) | < 0.0001 | 1.68 (1.44, 1.97) | < 0.0001 |
| MUO                        | 2.71 (2.31, 3.18) | < 0.0001 | 1.92 (1.63, 2.26) | < 0.0001 |

Model 1: Adjusted for age, sex, and ethnicity only.

Model 2: Additionally adjusted for education level and deprivation index.

MHN: metabolically healthy non-obese; MHO; metabolically healthy obese; MUN; metabolically unhealthy non-obese; MUO metabolically unhealthy obese

**ESM Table 4.** Association between incident diabetes and subsequent outcomes with adjustment of baseline MHO status

|                     | <b>HR (95% CI)</b> | <b>P</b> |
|---------------------|--------------------|----------|
| Incident ASCVD      | 0.68 (0.59, 0.80)  | <0.0001  |
| Incident HF         | 1.00 (0.86, 1.17)  | 0.97     |
| All-cause mortality | 0.88 (0.79, 0.99)  | 0.03     |
| Fatal ASCVD         | 0.83 (0.66, 1.06)  | 0.14     |
| Fatal HF            | 1.29 (0.89, 1.87)  | 0.18     |

Adjusted for age, sex ethnicity, education, deprivation, smoking, alcohol drinking, television viewing, physical activity, intake of fruit and vegetables, oily fish, red meat and processed meat, and baseline MHO status

Incident diabetes was the exposure variable coded as 1 when diabetes was recorded between the baseline assessment and the incidence of the outcome (for people who developed the outcome) or the date of censoring (for censored observations), or 0 otherwise.

**ESM Figure 1.** Association between MHO and health outcomes with non-obesity as reference group

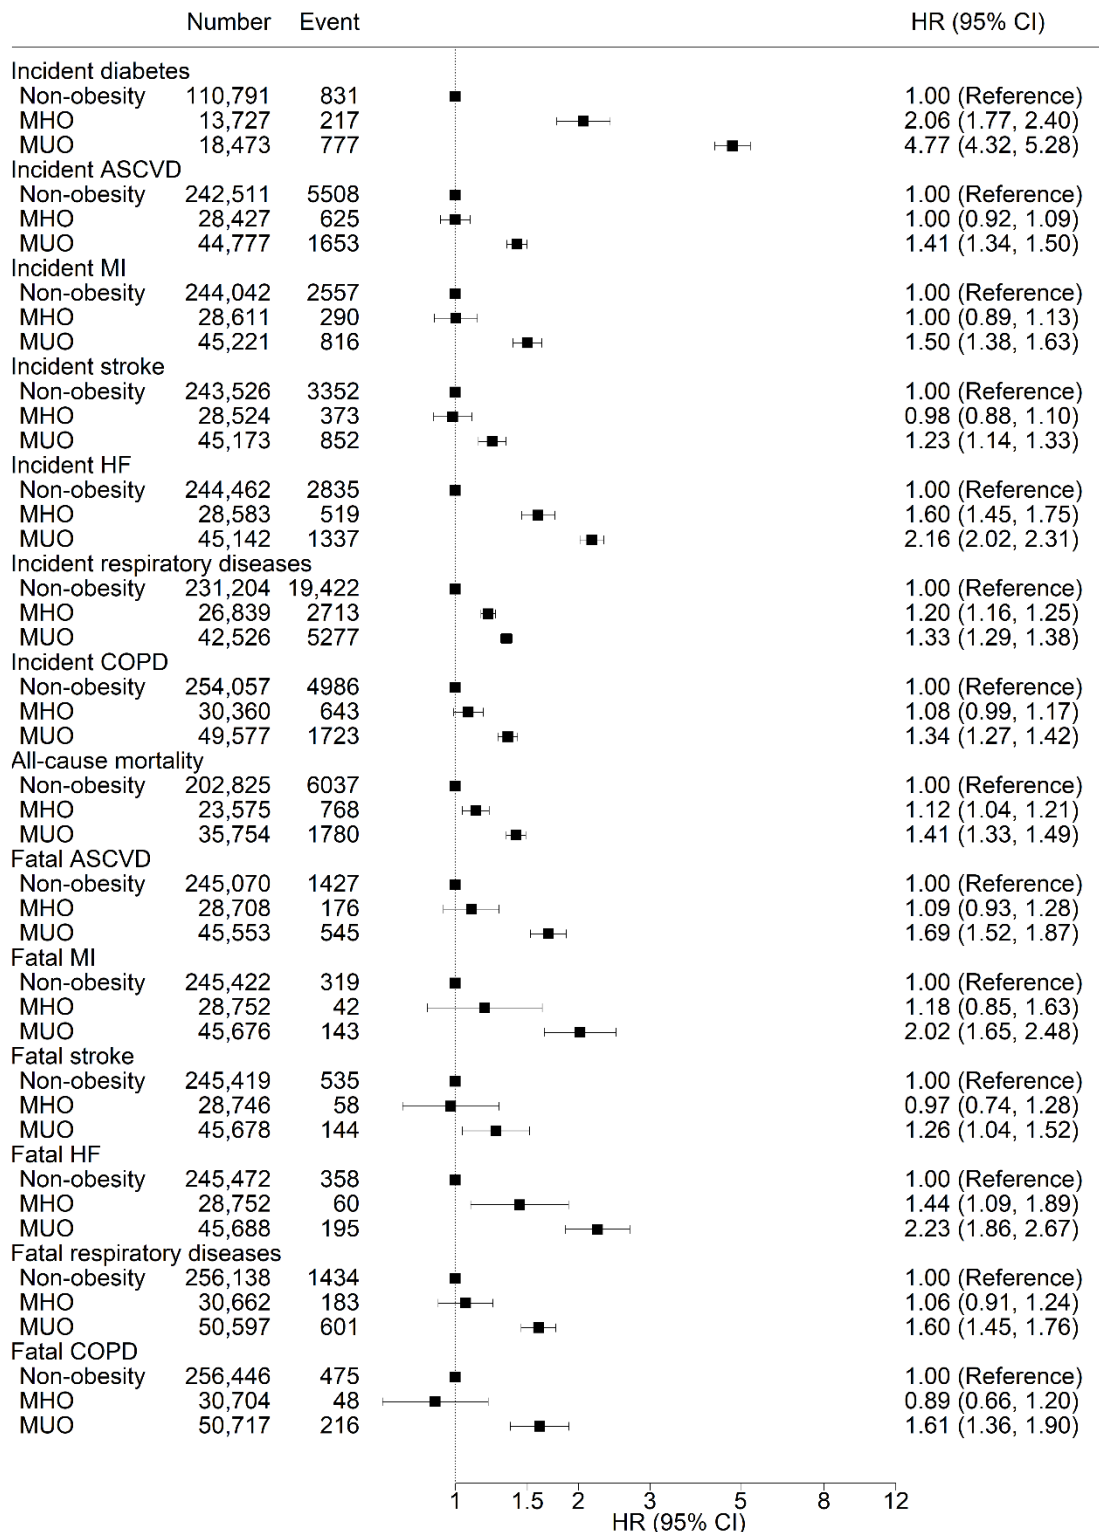

Adjusted for age, sex ethnicity, education, deprivation, smoking, alcohol drinking, television viewing, physical activity, and intake of fruit and vegetables, oily fish, red meat and processed meat  
 HR shown in logarithmic scale.

**ESM Figure 2.** Association between MHO and health outcomes in a 5-year landmark analysis

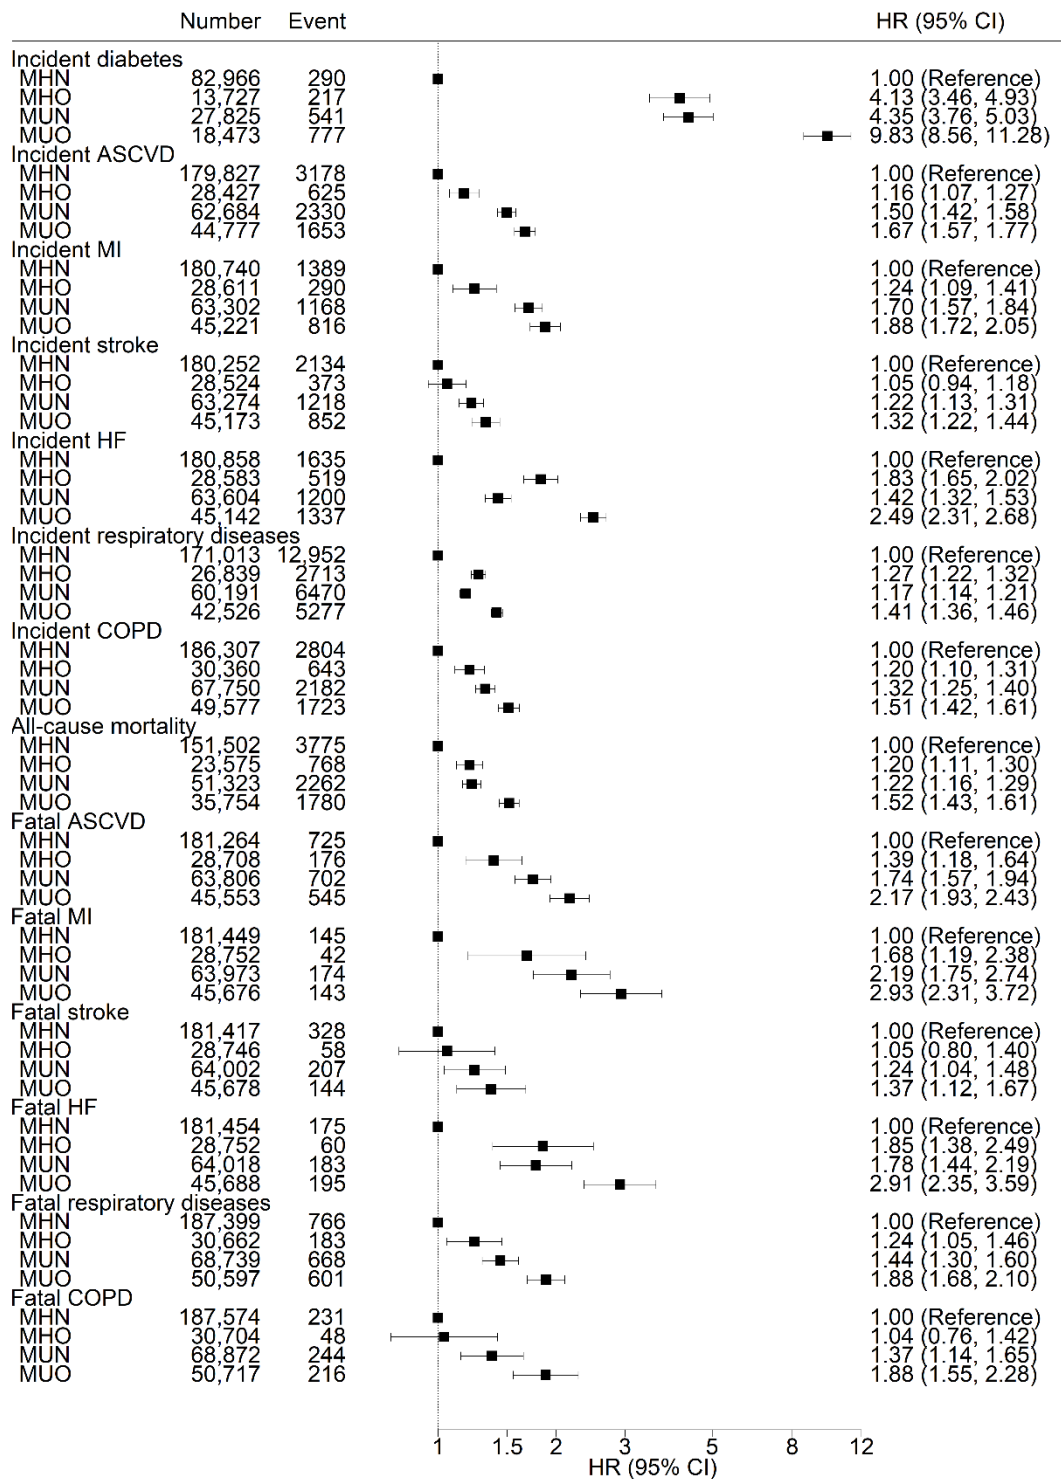

Participants who had corresponding events in the first five years of follow-up were excluded. Adjusted for age, sex ethnicity, education, deprivation, smoking, alcohol drinking, television viewing, physical activity, and intake of fruit and vegetables, oily fish, red meat and processed meat  
HR shown in logarithmic scale.

**ESM Figure 3.** Interaction of obesity and metabolic health with health outcomes

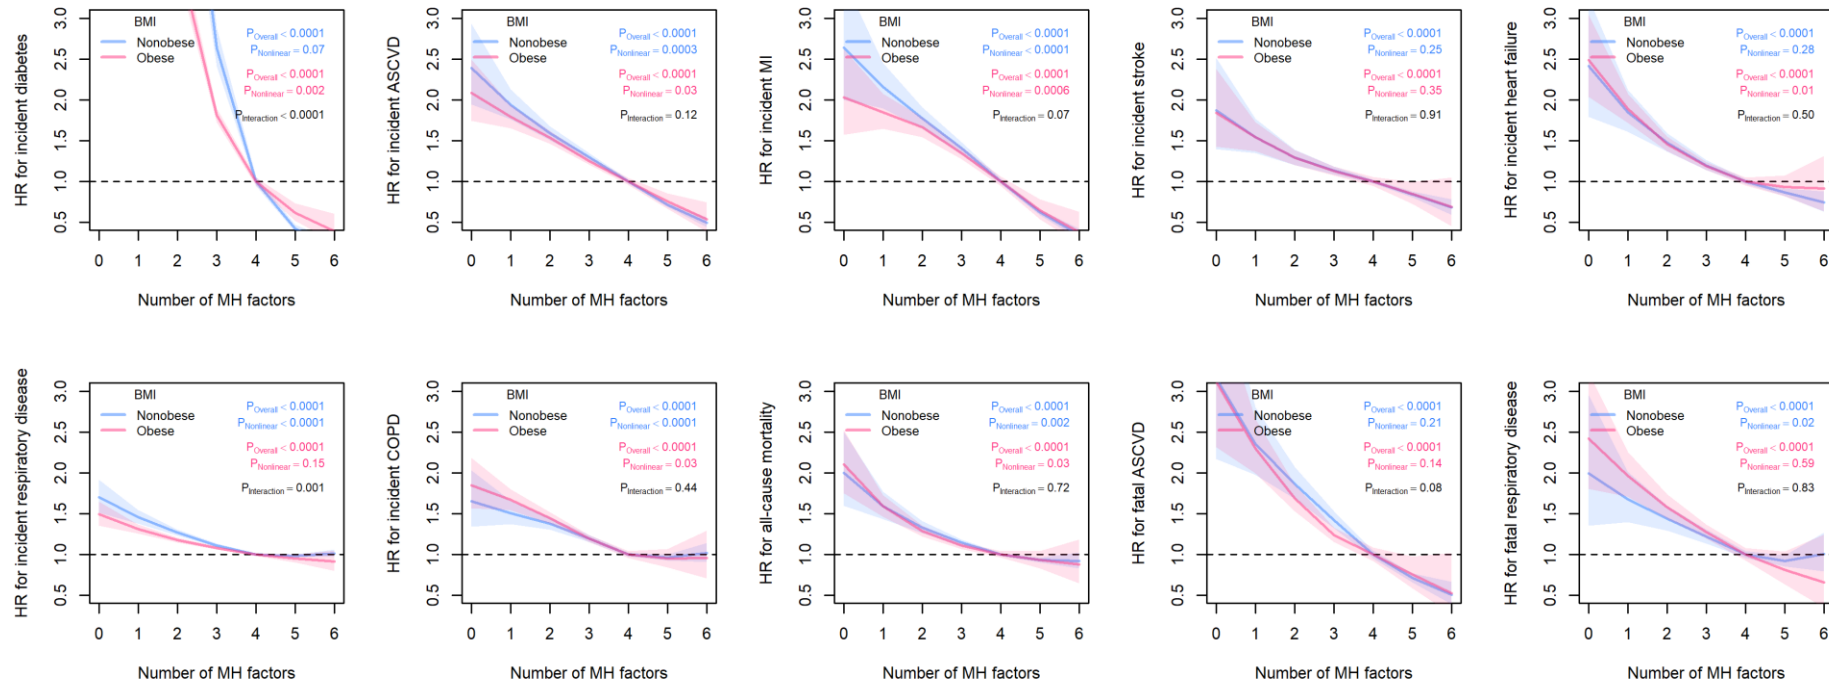

Main effects of obesity were not shown. Adjusted for each other and for age, sex ethnicity, education, deprivation, smoking, alcohol drinking, television viewing, physical activity, and intake of fruit and vegetables, oily fish, red meat and processed meat.



**ESM Figure 4.** Schoenfeld residuals for MHO

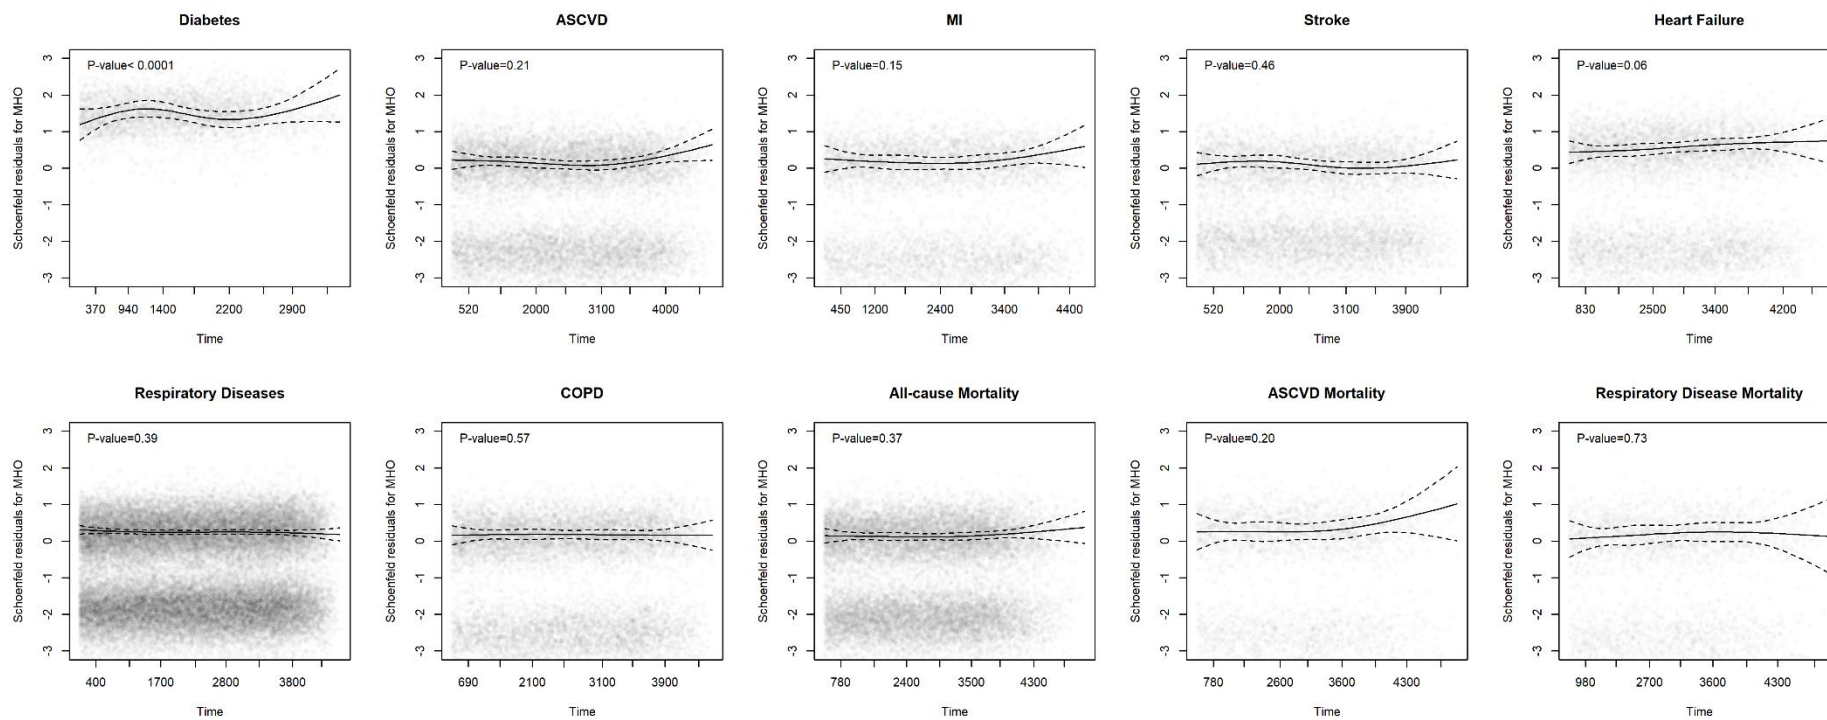

ESM Figure 5. Transition of metabolic health and obesity status

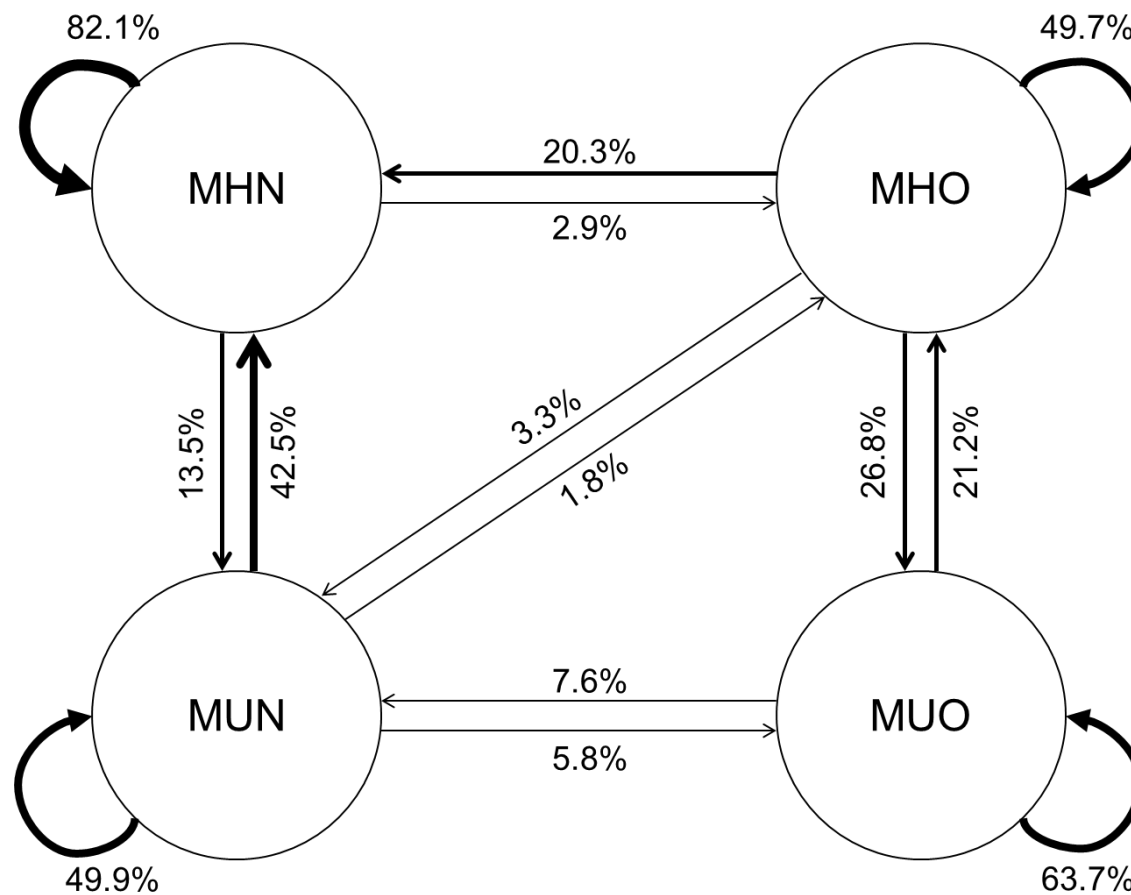

Supplement: MOESM1 [file 19243602]
